# Supplementary material
Source: Elsevier journal article supplement (https://www.sciencedirect.com/science/article/pii/S0120563319300506)
Supplement: mmc1 [file S0120563319300506:mmc1.docx]

**MATERIAL SUPLEMENTARIO**

**Tabla 3** Hallazgos ecocardiográficos experto *vs.* interno

| **Hallazgo ecocardiográfico**  **(n= 27)** | | **Experto** | **Interno** | **Kappa** | **p** |
| --- | --- | --- | --- | --- | --- |
| Fracción de eyección del ventrículo izquierdo | Levemente disminuida, % | 7,4 | 11,4 | 0,788 | <0,001 |
| Moderadamente disminuida, % | 11,1 | 7,4 |
| Severamente disminuida, % | 0 | 3,7 |
| Normal, % | 81,5 | 77,8 |
| Fracción de eyección del ventrículo izquierdo dicotomizada | Normal, % | 81,5 | 77,8 | 0,886 | <0,001 |
| Anormal. % | 18,5 | 22,2 |
| Ventrículo derecho | Disfunción, % | 7,4 | 3,7 | 0,649 | <0,001 |
| Normal, % | 92,6 | 96,3 |
| Aurícula izquierda | Dilatada, % | 40,7 | 29,6 | 0,760 | <0,001 |
| Normal, % | 59,3 | 70,4 |
| Derrame pericárdico | Leve, % | 0 | 0 | NA | NA |
| Moderado, % | 0 | 0 |
| Severo, % | 0 | 0 |
| No, % | 100 | 100 |
| Derrame pericárdico dicotomizada | Si, % | 0 | 0 | NA | NA |
| No, % | 100 | 100 |
| Hipertensión pulmonar | No, % | 70,4 | 88,9 | 0,458 | 0,005 |
| i, % | 29,6 | 11,1 |
| Válvula mitral | Doble lesión, % | 0 | 0 | 0,524 | 0,002 |
| Presencia de prótesis, % | 3,7 | 3,7 |
| Insuficiencia, % | 29,6 | 29,6 |
| Estenosis, % | 0 | 0 |
| Normal, % | 66,7 | 66,7 |
| Válvula mitral dicotomizada | Anormal, % | 33,3 | 33,3 | 0,500 | 0,009 |
| Normal, | 66,7 | 66,7 |
| Válvula tricúspide | Insuficiencia, % | 25,9 | 3,7 | 0,198 | 0,085 |
| Estenosis, % | 0 | 0 |
| Normal, % | 74,1 | 96,3 |
| Válvula tricúspide dicotomizada | Anormal, % | 25,9 | 3,7 | 0,198 | 0,085 |
| Normal, % | 74,1 | 96,3 |
| Vávlula aórtica | Doble lesión, % | 0 | 0 | NA | NA |
| Presencia de prótesis, % | 3,7 | 3,7 |
| Insuficiencia, % | 22,2 | 18,5 |
| Estenosis, % | 0 | 0 |
| Normal, % | 74,1 | 77,8 |
| Válvula aórtica dictomizada | Anormal, % | 25,9 | 22,2 | 0,494 | 0,010 |
| Normal, % | 74,1 | 77,8 |

**Tabla 4** Hallazgos ecocardiográficos experto *vs.* residentes de Medicina Interna (número total para los 2 residentes)

| **Hallazgo ecocardiográfico**  **(n= 105)** | | **Experto** | **Residente** | ***Kappa*** | **p** |
| --- | --- | --- | --- | --- | --- |
| Fracción de eyección del ventrículo izquierdo | Levemente disminuida, % | 14,3 | 21,9 | 0,502 | <0,001 |
| Moderadamente disminuida, % | 18,1 | 26,7 |
| Severamente disminuida, % | 15,2 | 15,2 |
| Normal, % | 52,4 | 36,2 |
| Fracción de eyección del ventrículo izquierdo dicotomizada | Normal, % | 52,4 | 36,2 | 0,568 | <0,001 |
| Reducida, % | 47,6 | 63,8 |
| Ventrículo derecho | Disfunción, % | 19,0 | 24,8 | 0,446 | <0,001 |
| Normal, % | 81,0 | 75,2 |
| Aurícula izquierda | Dilatada, % | 41,9 | 36,2 | 0,442 | <0,001 |
| **Normal, %** | 58,1 | 58,1 |
| Derrame pericárdico | Leve, % | 3,8 | 12,4 | 0,063 | 0,435 |
| Moderado, % | 0 | 0 |
| Severo, % | 0 | 0 |
| No, % | 96,2 | 87,6 |
| Derrame pericárdico dicotomizada | Si, % | 3,8 | 12,4 | 0,063 | 0,435 |
| No, % | 96,2 | 87,6 |
| Hipertensión pulmonar | No, % | 88,6 | 75,2 | 0,314 | <0,001 |
| Si, % | 11,4 | 24,8 |
| Válvula mitral | Doble lesión, % | 0 | 1,0 | 0,386 | <0,001 |
| Presencia de prótesis, % | 0 | 1,0 |
| Insuficiencia, % | 30,5 | 22,9 |
| Estenosis, % | 1,9 | 1,9 |
| Normal, % | 67,6 | 73,3 |
| Válvula mitral dicotomizada | Anormal, % | 32,4 | 26,7 | 0,407 | <0,001 |
| Normal, % | 67,6 | 73,3 |
| Válvula tricúspide | Insuficiencia, % | 17,1 | 9,5 | 0,023 | 0,801 |
| Estenosis, % | 0 | 0 |
| Normal, % | 82,9 | 90,5 |
| Tricúspide dicotomizada | Anormal, % | 17,1 | 9,5 | 0,023 | 0,801 |
| Normal, % | 82,9 | 90,5 |
| Válvula aórtica | Doble lesión, % | 0 | 0 | NA | NA |
| Presencia de prótesis, % | 1,0 | 1,0 |
| Insuficiencia, % | 17,1 | 10,5 |
| Estenosis, % | 1,0 | 1,0 |
| Normal, % | 81,0 | 87,6 |
| Aórtica dicotomizada | Anormal, % | 9,0 | 12,4 | 0,037 | 0,693 |
| Normal, % | 81,0 | 87,6 |

**Tabla 5** Hallazgos ecocardiográficos experto *vs*. intensivistas (número total para los 2 intensivistas)

| **Hallazgo ecocardiográfico**  **(n= 89)** | | **Experto** | **Intensivista** | **Kappa** | **p** |
| --- | --- | --- | --- | --- | --- |
| Fracción de eyección del ventrículo izquierdo | Levemente disminuida, % | 20,2 | 14,6 | 0,360 | <0,001 |
| Moderadamente disminuida, % | 18,0 | 19,1 |
| Severamente disminuida, % | 10,1 | 13,5 |
| Normal, % | 51,7 | 52,8 |
| Fracción de eyección del ventrículo izquierdo dicotomizada | Normal, % | 51,7 | 52,8 | 0,392 | <0,001 |
| Reducida, % | 48,3 | 47,2 |
| Ventrículo derecho | Disfunción, % | 14,6 | 11,2 | 0,253 | 0,016 |
| Normal, % | 85,4 | 88,8 |
| Aurícula izquierda | Dilatada, % | 48,3 | 24,7 | 0,291 | 0,002 |
| Normal, % | 51,7 | 75,3 |
| Derrame pericárdico | Leve, % | 3,4 | 7,9 | 0,298 | 0,001 |
| Moderado, % | 0 | 0 |
| Severo, % | 1,1 | 1,1 |
| No, % | 95,5 | 91,0 |
| Derrame pericárdico dicotomizada | No, % | 95,5 | 91,0 | 0,291 | 0,003 |
| Si, % | 4,5 | 9,0 |
| Hipertensión pulmonar | No, % | 80,9 | 85,4 | 0,281 | 0,007 |
| Si, % | 19,1 | 14,6 |
| Válvula mitral | Doble lesión, % | 2,2 | 0 | NA | NA |
| Prótesis, % | 2,2 | 2,2 |
| Insuficiencia, % | 30,3 | 27,0 |
| Estenosis, % | 0 | 1,1 |
| Normal, % | 65,2 | 69,6 |
| Válvula mitral dicotomizada | Anormal, % | 34,8 | 30,4 | 0,519 | <0,001 |
| Normal, % | 65,2 | 69,6 |
| Válvula tricúspide | Insuficiencia, % | 31,5 | 30,3 | 0,711 | <0,001 |
| Estenosis, % | 0 | 0 |
| Normal, % | 68,5 | 69,7 |
| Válvula tricúspide dicotomizada | Anormal, % | 31,5 | 30,3 | 0,711 | <0,001 |
| Normal ,% | 68,5 | 69,7 |
| Válvula aórtica | Doble lesión, % | 0 | 0 | NA | NA |
| Prótesis, % | 1,1 | 1,1 |
| Insuficiencia, % | 16,9 | 7,9 |
| Estenosis, % | 0 | 1,1 |
| Normal, % | 82,0 | 89,9 |
| Válvula aórtica dicotomizada | Anormal, % | 8,0 | 89,9 | 0,311 | 0,002 |
| Normal, % | 82,0 | 10,1 |
